# Supplementary material
Source: PubMed Central journal article supplement (PMC3835596)
Supplement: NIHMS251223-supplement-01.pdf [file NIHMS251223-supplement-01.pdf]

**Supplementary Table 1. Clinical characteristics of patients treated for recurrent HCV according to recipient : donor IL28B genotype**

|                                                            | <b>Donor non-CC / Recip non-CC</b> | <b>Donor CC / Recip non-CC</b> | <b>Donor non-CC / Recip CC</b> | <b>Donor CC / Recip CC</b> | <b>P-value</b> |
|------------------------------------------------------------|------------------------------------|--------------------------------|--------------------------------|----------------------------|----------------|
| <b>N*</b>                                                  | 19                                 | 22                             | 12                             | 7                          |                |
| <b>Age, yrs (median, IQR)</b>                              | 51 (48 - 57)                       | 52 (46 - 58)                   | 50 (47 - 57)                   | 53 (51 - 59)               | 0.6353         |
| <b>Donor age, yrs (median, IQR)</b>                        | 54 (31 - 61)                       | 34 (22 - 51)                   | 46 (24 - 58)                   | 42 (35 - 49)               | 0.1437         |
| <b>Gender</b>                                              | 16 (84%)                           | 14 (64%)                       | 9 (75%)                        | 5 (71%)                    | 0.5246         |
| <b>Ethnicity</b>                                           |                                    |                                |                                |                            |                |
| <b>Caucasian</b>                                           | 15 (79%)                           | 20 (90%)                       | 12 (100%)                      | 7 (100%)                   | 0.8433         |
| <b>African American</b>                                    | 1 (5%)                             | 0 (0%)                         | 0 (0%)                         | 0 (0%)                     |                |
| <b>Other</b>                                               | 3 (16%)                            | 2 (10%)                        | 0 (0%)                         | 0 (0%)                     |                |
| <b>HCV RNA level, log<sub>10</sub> IU/mL (median, IQR)</b> | 6.3 (5.5 – 6.7)                    | 6.5 (6.1 – 6.8)                | 5.5 (5.2 – 6.1)                | 6.0 (5.5 – 6.1)            | 0.0155         |
| <b>HCV genotype**</b>                                      |                                    |                                |                                |                            |                |
| <b>1</b>                                                   | 13 (76%)                           | 16 (73%)                       | 7 (64%)                        | 4 (67%)                    | 0.7035         |
| <b>2</b>                                                   | 3 (18%)                            | 3 (14%)                        | 1 (9%)                         | 1 (17%)                    |                |
| <b>3</b>                                                   | 0 (0%)                             | 2 (9%)                         | 3 (27%)                        | 2 (17%)                    |                |
| <b>4</b>                                                   | 1 (6%)                             | 1 (5%)                         | 0 (0%)                         | 0 (0%)                     |                |
| <b>Fibrosis stage</b>                                      |                                    |                                |                                |                            |                |
| <b>0</b>                                                   | 13 (68%)                           | 10 (45%)                       | 6 (50%)                        | 4 (57%)                    | 0.1351         |
| <b>1</b>                                                   | 2 (11%)                            | 5 (23%)                        | 3 (25%)                        | 0 (0%)                     |                |
| <b>2</b>                                                   | 1 (5%)                             | 3 (14%)                        | 3 (25%)                        | 0 (0%)                     |                |
| <b>3</b>                                                   | 3 (16%)                            | 4 (18%)                        | 0 (0%)                         | 2 (29%)                    |                |
| <b>4</b>                                                   | 0 (0%)                             | 0 (0%)                         | 0 (0%)                         | 1 (14%)                    |                |
| <b>Warm ischemia time (median, IQR)</b>                    | 47 (36-51)                         | 49 (38 - 60)                   | 56 (37 - 60)                   | 44 (42 - 67)               | 0.8561         |
| <b>Cold ischemia ime (median, IQR)</b>                     | 479 (362-514)                      | 444 (411 - 504)                | 424 (378 - 456)                | 453 (356 - 508)            | 0.96           |

|                                                             |                  |                   |                    |                    |        |
|-------------------------------------------------------------|------------------|-------------------|--------------------|--------------------|--------|
| <b>Interval between LT and HCV recurrence (median, IQR)</b> | 0.61 (0.29-2.49) | 1.0 (0.38 - 2.33) | 0.60 (0.28 - 2.89) | 0.95 (0.29 - 2.02) | 0.9357 |
| <b>pegIFN vs standard IFN</b>                               | 16 (84%)         | 15 (68%)          | 10 (83%)           | 4 (57%)            | 0.3855 |
| <b>RBV combination therapy***</b>                           | 14 (78%)         | 20 (95%)          | 12 (100%)          | 7 (100%)           | 0.4435 |
| <b>EPO therapy</b>                                          | 8 (42%)          | 10 (45%)          | 7 (58%)            | 2 (33%)            | 0.7433 |
| <b>Dose reduction</b>                                       | 10 (53%)         | 19 (86%)          | 10 (83%)           | 6 (86%)            | 0.06   |
| <b>Treatment duration</b>                                   | 47 (23 – 73)     | 50 (32 – 60)      | 34 (20 – 52)       | 54 (32 – 76)       | 0.3087 |
| <b>SVR</b>                                                  | 3/19 (16%)       | 11/22 (50%)       | 5/12 (42%)         | 6/7 (86%)          | 0.0095 |

Data = n (%) unless otherwise indicated

\* 5 patients could not be evaluated for SVR

\*\* HCV genotype missing in 4

\*\*\* Missing in 2
